# Supplementary material for: Cellular prion protein exacerbates brain demyelination by activating microglia through the TREM2-TYROBP axis in cuprizone-treated animals
Source: Research Square preprint supplement (doi:10.21203/rs.3.rs-7704970/v1), 2025-10-15
Supplement: Supplementary file 1 [file 039b1287381098200742227c.docx]

Supplementary Information

Cellular prion protein exacerbates brain demyelination by activating microglia through the TREM2-TYROBP axis in cuprizone-treated animals

Qing Li1ǂ, Pengcheng Huang1ǂ, Jinqiong Zhan2ǂ, Hancun Yi1, Zihao Zhang1, Pingping Shen3, Yuanjian Yang2, Yanming Wang4, Daojun Hong1, Jiyan Ma5,6*, Xiaomu Wu1,7*, Wen-Quan Zou1

1Institute of Neurology and Department of Neurology, The First Affiliated Hospital, Jiangxi Medical College, Nanchang University, Nanchang 330006, Jiangxi Province, China;

2Jiangxi Mental Hospital & Affiliated Mental Hospital, Jiangxi Medical College, Nanchang University, Nanchang 330029, Jiangxi, China;

3Department of Neurology, The First Hospital of Jilin University, Changchun, China.

4Institute of Nuclear Medicine Molecular Imaging, Binzhou Medical University Hospital, Binzhou 256603, Shandong Province, China;

5Beijing Institute for Brain Research, Chinese Academy of Medical Sciences & Peking Union Medical College, Beijing, 102206, China;

6Chinese Institute for Brain Research, Beijing, 102206, China;

7Jiangxi Provincial Institute of Neurology, Nanchang 330006, Jiangxi Province, China.

ǂContributed equally to this work.

*Corresponding authors: Wen-Quan Zou, E-mail: [wenquanzou@ncu.edu.cn](mailto:wenquanzou@ncu.edu.cn); Xiaomu Wu, E-mail: [wuxm79@163.com](mailto:wuxm79@163.com); Jiyan Ma, E-mail: majiyan@cibr.ac.cn.

**
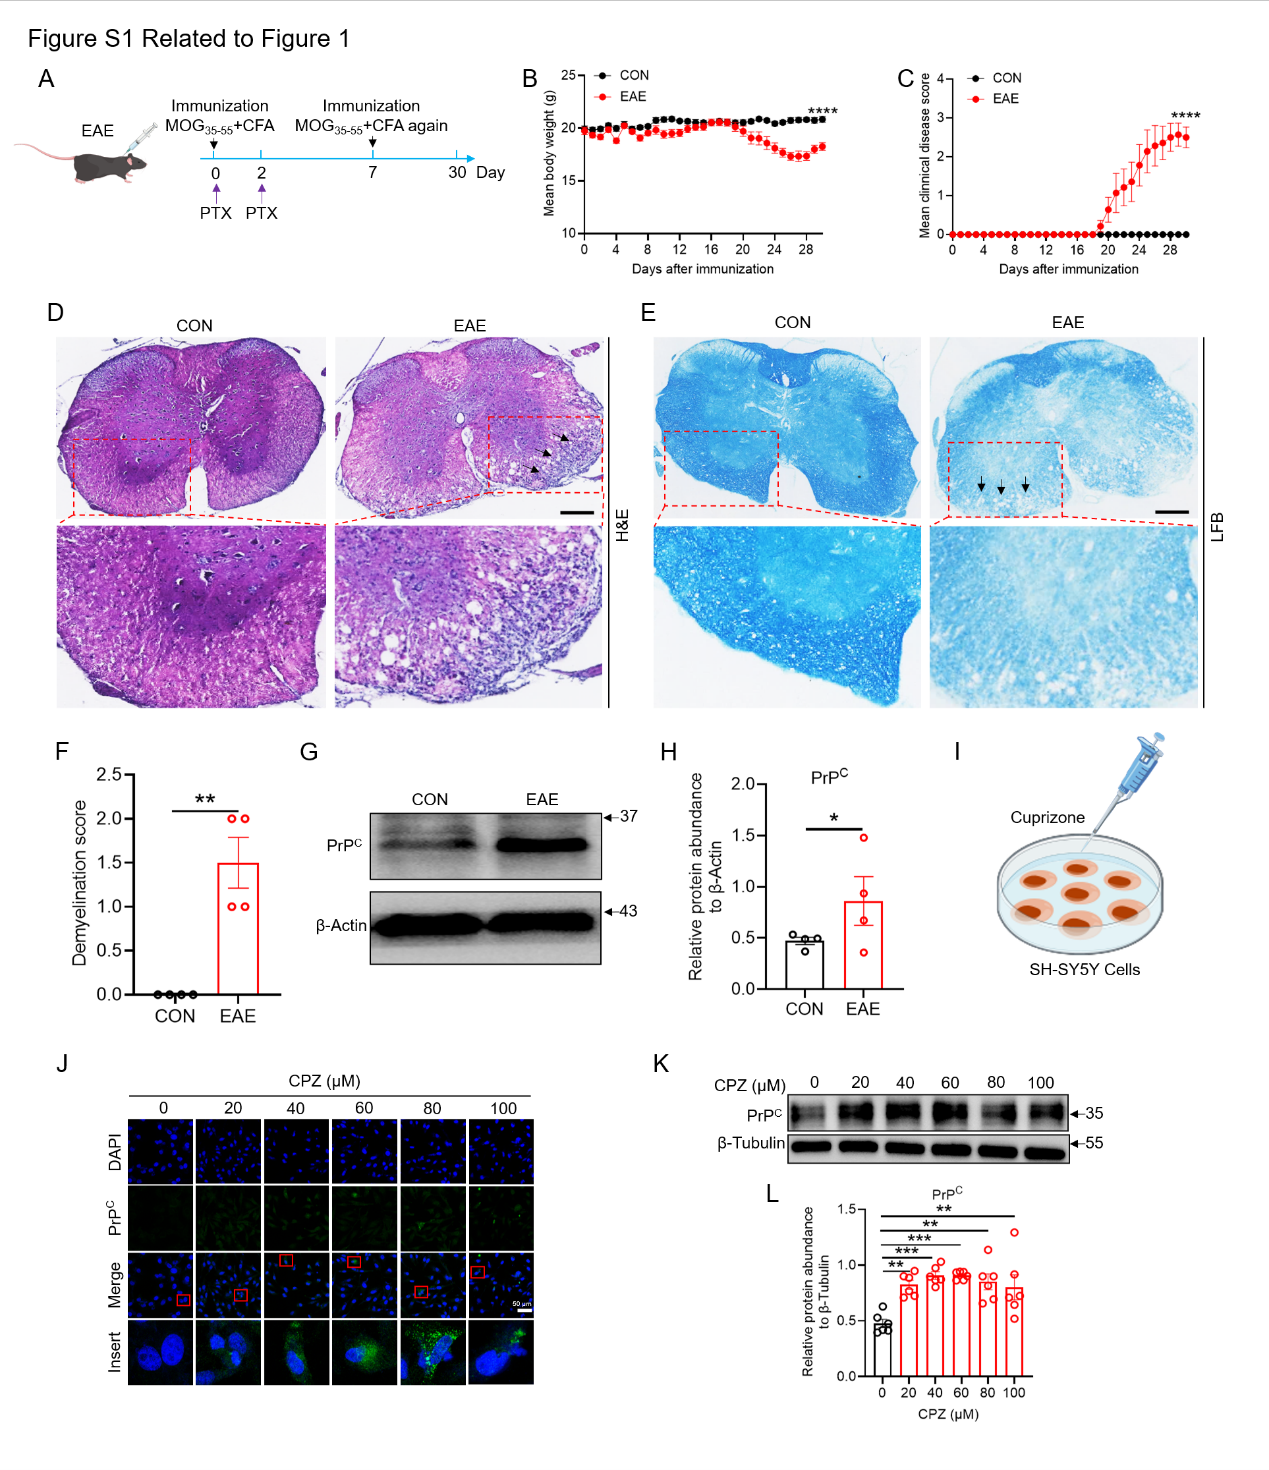
Supplementary figures and figure legends**

**Figure S1 PrPC is up-regulated in EAE mice and in cuprizone-treated SH-SY5Y cells.** (**A**) Schematic of the experimental timeline for EAE induction using MOG35–55 over 30 days. (**B**) and (**C**) Mean body weight and mean clinical disease scores, respectively, in EAE and CON mice. 7 mice/group. (**D**) and (**E**) Representative H&E staining (showing immune cell infiltration, black arrows) and LFB staining (demyelination, black arrows) of spinal cord sections from EAE and CON mice. Scale bars = 300 μm. (**F**) Demyelination score in lumbar spinal cords of EAE and CON mice, graded as follows: 0: normal, 1: disordered nerve fibers, 2: formation of distinct vacuoles, 3: disappearance of myelin fibers. 4 mice/group. (**G**) and (**H**) Western blot and quantitative analysis of PrPC expression in lumbar spinal cord tissues 30 days after EAE induction 4 mice/group. (**I**) Experimental design for treating SH-SY5Y cells with cuprizone (0–100 µM, 24 hours). (**J**) Immunofluorescence staining of PrPC (green) in cuprizone-treated SH-SY5Y cells. Nuclei were stained with DAPI (blue). Scale bars = 50 μm and 8.5 μm. (**K**) and (**I**) Western blot and quantification of PrPC in SH-SY5Y cells after cuprizone treatment. 6 mice/group. Data are represented as means ± SEM. **p* < 0.05; ***p* < 0.01; ****p* < 0.001; *****p* < 0.0001. Two-way ANOVA with Sidak’s multiple comparisons test was used for panels (**B**) and (**C**). Unpaired *t* test was used for panels (**F**) and (**H**). One-way ANOVA with Tukey’s multiple comparisons was used for (**L**).

**
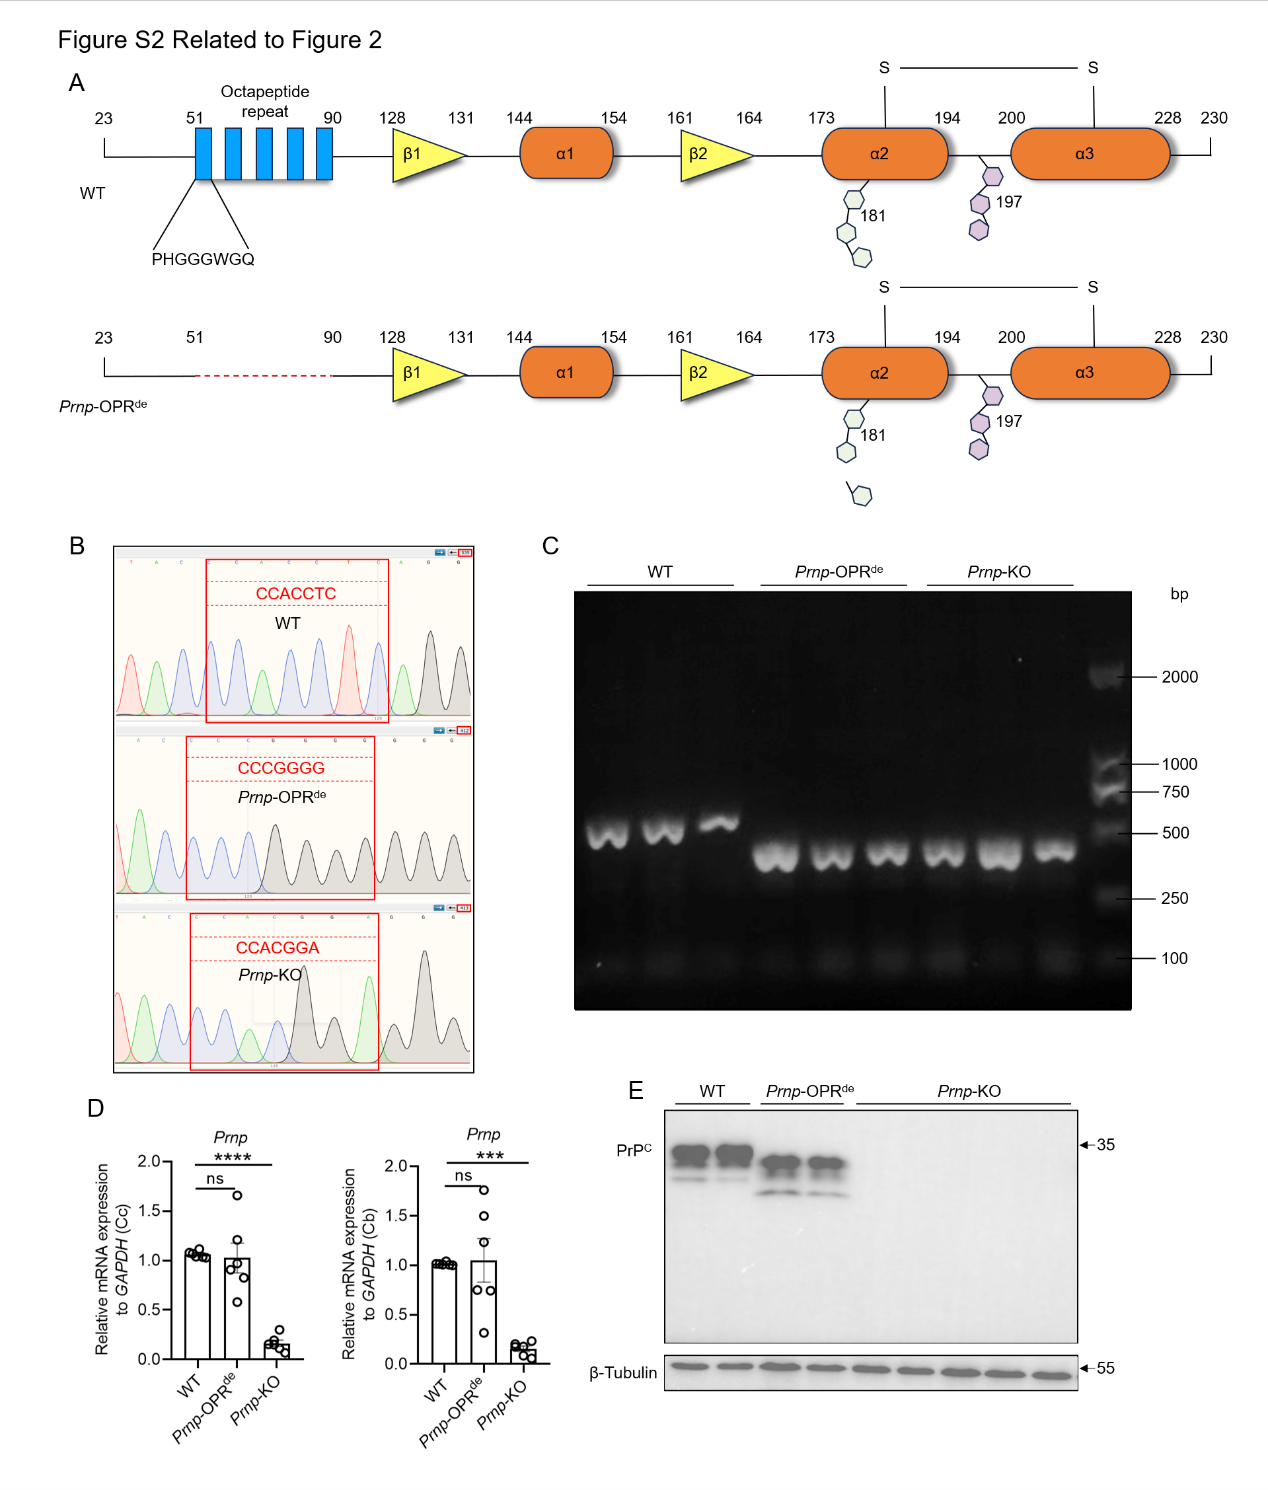
Figure S2 Validation of *Prnp* knockout and OPR-deletion in mice at various molecular levels.** (**A**) Schematic of mature PrPC structure, illustrating the domains deleted in *Prnp*-OPR (aa 51–90) and *Prnp*-KO (entire mature PrP, aa 23–230). The red dashed line indicates the deleted region. (**B**) Sanger sequencing confirmation of PrP sequences in the three genotypes. Wild-type (WT): CCACCTC; *Prnp*-OPRde: CCCGGGG; *Prnp*-KO: CCACGGA. (**C**) DNA agarose gel electrophoresis of PrP sequences across the three genotypes. (**D**) RT-qPCR analysis of PrP mRNA expression levels. Data are presented as means ± SEM; ns *p* > 0.05, ***p* < 0.01, ****p* < 0.001 (one-way ANOVA with Tukey’s test). (**E**) Western blot analysis of PrP protein expression in the three genotypes.

**
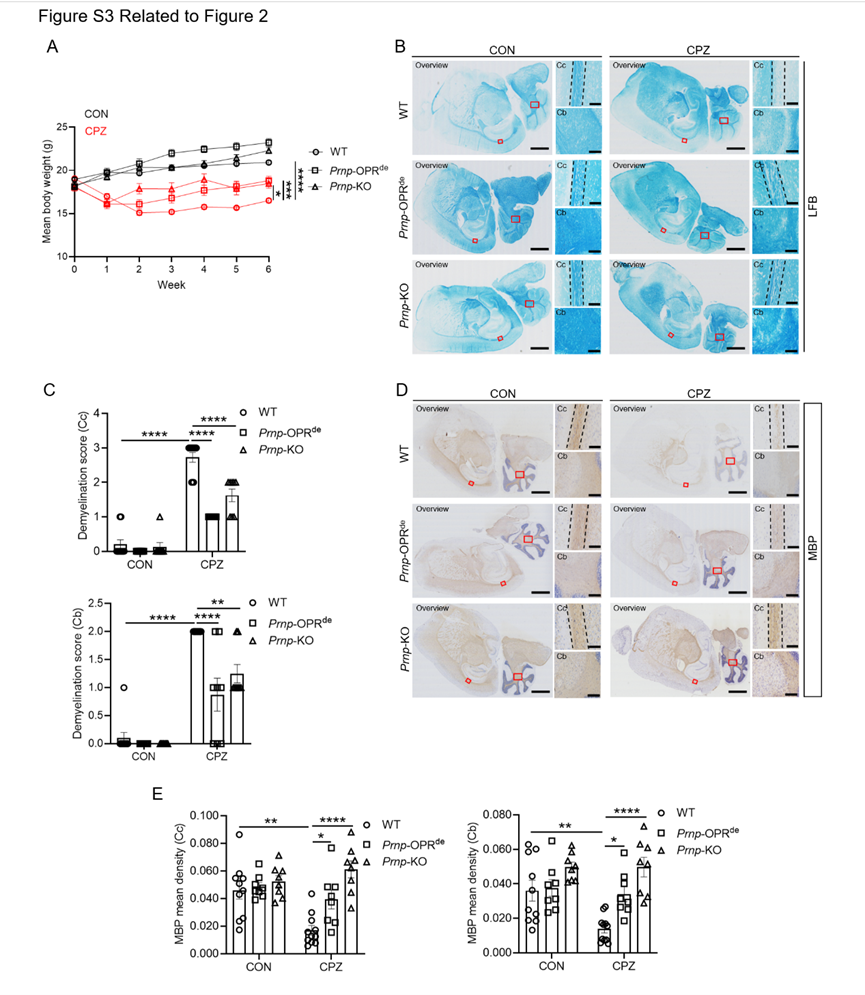
**

**Figure S3 Knockout and OPR-deletion of *Prnp* ameliorates demyelination in female CPZ-treated mice.** (**A**) Mean body weight of mice treated with CPZ or control (CON) diet. 7–26/group. Two-way ANOVA with Tukey’s multiple comparisons test was used. (**B**) Representative LFB staining of sagittal brain sections showing myelination in the Cc and Cb. The black dashed line outlines the Cc. Scale bars = 50 μm (Cc) and 100 μm (Cb). (**C**) Demyelination scores in CPZ- or CON-treated mice. 8–11 mice/group. (**D**) Representative immunohistochemical staining of MBP in sagittal sections of Cc and Cb. The black dashed line indicates the Cc. Scale bars = 50 μm (Cc) and 100 μm (Cb). (**E**) Densitometric quantification of MBP staining. 8–11 mice/group. Data are represented as means ± SEM. **p* < 0.05; ***p* < 0.01; ****p* < 0.001; *****p* < 0.0001. One-way ANOVA with Tukey’s multiple comparisons test was applied to panels (**C**) and (**E**).

**
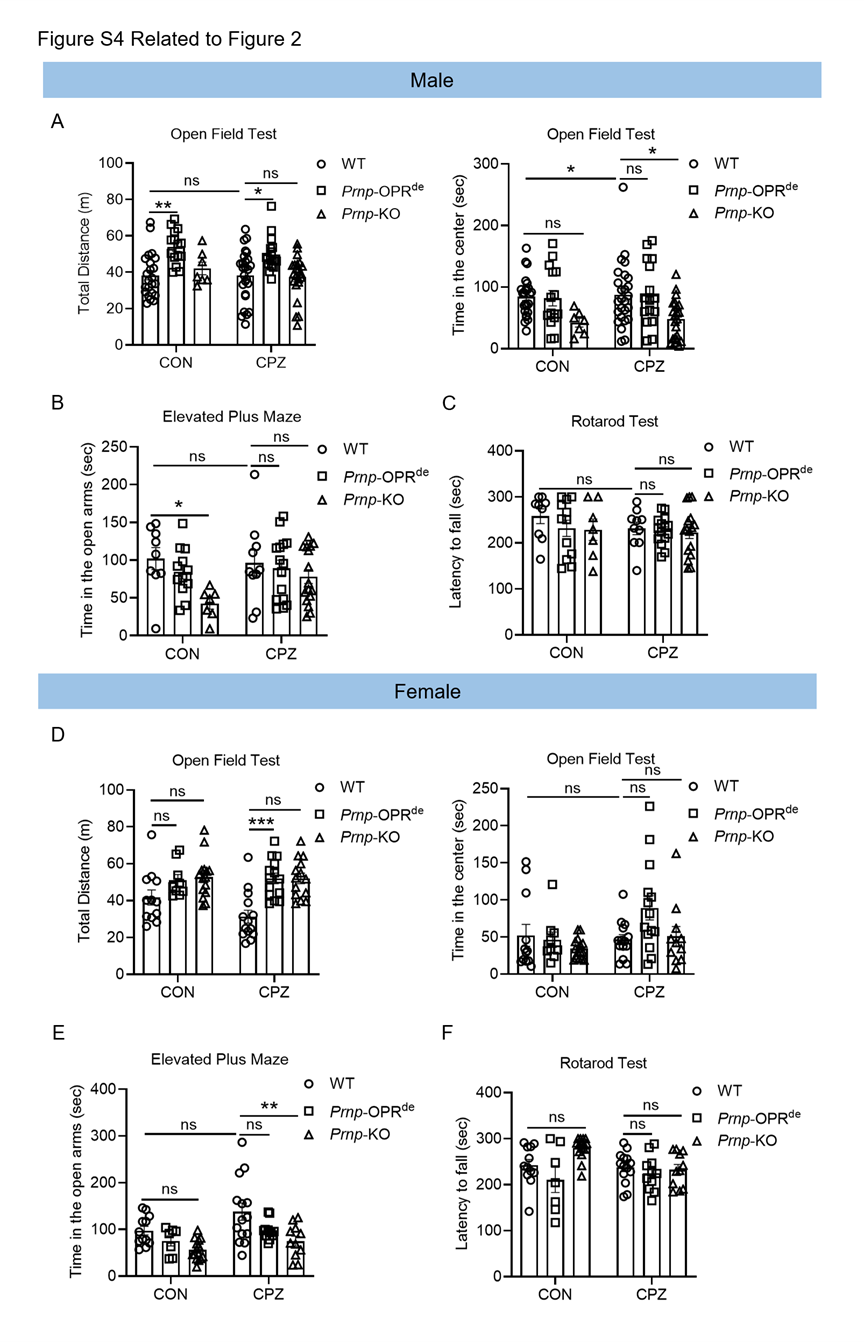
**

**Figure S4** **Behavioral assessment of anxiety and motor function.** (**A**) and (**D**)Total distance traveled and time spent in the central area during the open field test for male and female mice, respectively. 7–26 mice/group. (**B**) and (**E**) Time spent in the open arms during the elevated plus maze test for male and female mice, respectively. 7–26 mice/group. (**C**) and (**F**) Latency to fall during the rotarod test for male and female mice, respectively. 7–26 mice/group. Data are represented as means ± SEM. ns p > 0.05; **p* < 0.05; ***p* < 0.01; ****p* < 0.001. One-way ANOVA with Tukey’s multiple comparisons test was used for all analyses.

**
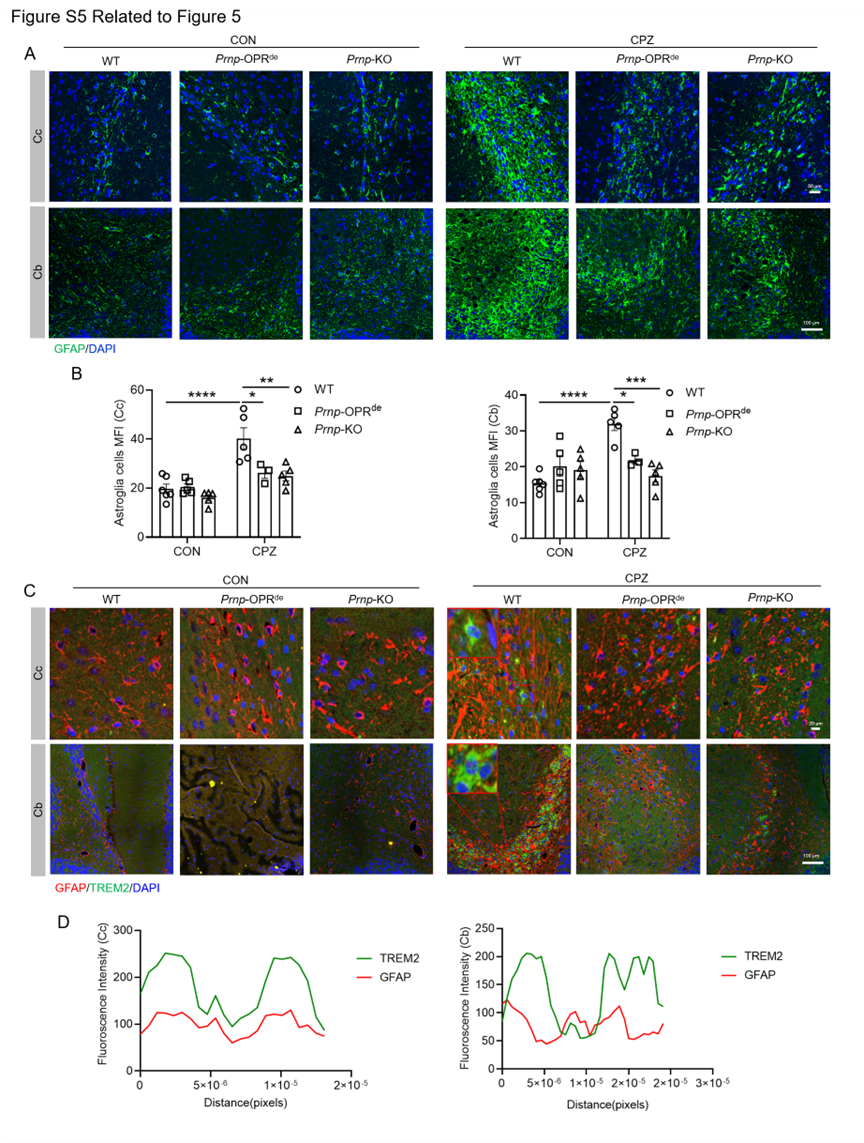
**

**Figure S5 Inhibition of TREM2 expression via *Prnp* knockout or OPR deletion does not correlate with astrocyte activation in CPZ-treated mice.** (**A**) Representative immunofluorescence image showing staining of astrocytes marker GFAP (green) in the Cc and Cb of mice. Nuclei were counterstained with DAPI. (blue). Scale bars = 20 μm (Cc) and 100 μm (Cb). (**B**) Quantification of MFI of GFAP MFI in Cc and Cb regions. 4–6 mice/group. Statistical analysis was performed using one-way ANOVA with Tukey’s multiple comparisons test. (**C**) Representative dual immunofluorescence staining of TREM2 (green) and GFAP (red) in Cc and Cb. The red rectangle highlights regions of GFAP and TREM2 co-localization. Nuclei were stained with DAPI (blue). Scale bars = 20 μm (Cc) and 100 μm (Cb). (**D**) In WT mice, spatial overlap of GFAP and TREM2 fluorescence peaks was observed, and co-localization was quantified using Leica confocal imaging software. Data are expressed as means ± SEM. **p* < 0.05, ***p* < 0.01, ****p* < 0.001, *****p* < 0.0001.

**
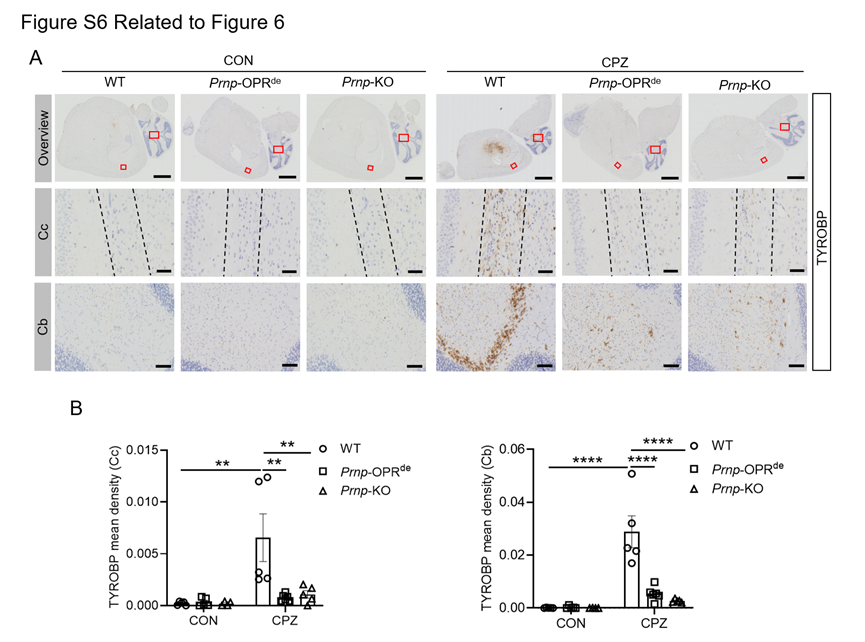
**

**Figure S6** **Upregulation of TYROBP in CPZ-treated mice is abolished by *Prnp* knockout and OPR deletion, as assessed by IHC.**(**A**) Representative immunohistochemical staining of TYROBP in sagittal sections of Cc and Cb from CPZ-/CON-treated mice. The red rectangle indicates the enlarged area. The Cc is outlined with a black dashed line. Scale bars = 2 mm (Overview), 50 μm (Cc) and 100 μm (Cb). (**B**) Densitometric quantification of TYROBP expression. 5 mice/group. Data are represented as means ± SEM. ***p* < 0.01; *****p* < 0.0001.

**
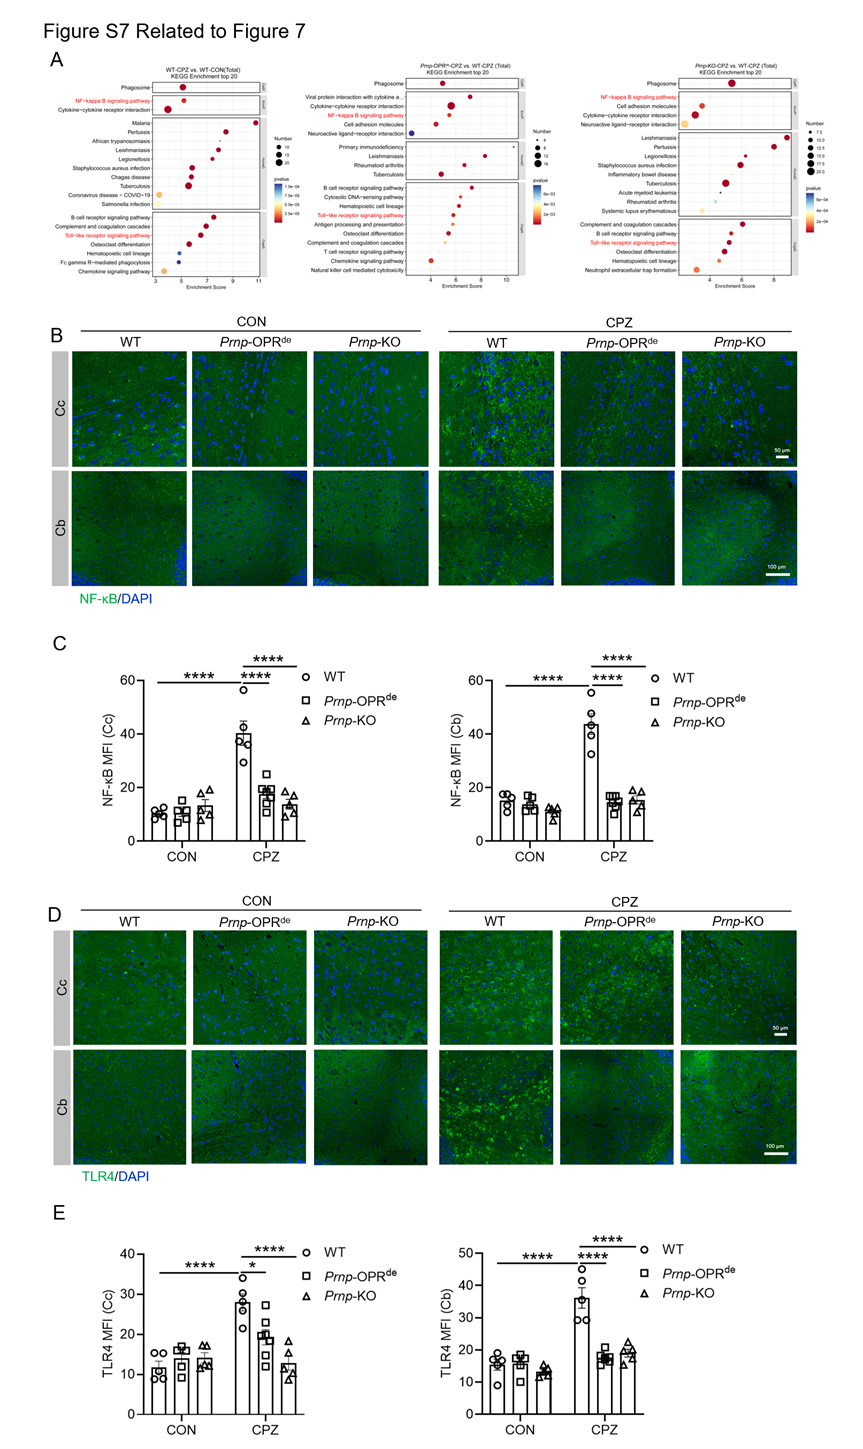
**

**Figure S7**. **Knockout and OPR-deletion of *Prnp* inhibit activation of NF-κB and TLR4 pathways.** (**A**) Bubble plot showing KEGG enrichment analysis of the NF-κB and TLR4 signaling pathways. (**B**)and(**C**) Representative immunofluorescence staining of NF-κB (B) and TLR4 (C) (green) in the Cc and Cb. Nuclei were counterstained with DAPI (blue). Scale bars = 50 μm (Cc) and 100 μm (Cb). Quantification of MFI of NF-κB (**D**) and TLR4 (**E**) MFI in the Cc and Cb of CPZ-/sham-treated mice. 5–7 mice/group. Data are represented as means ± SEM. **p* < 0.05; ***p* < 0.01; ****p* < 0.001; *****p* < 0.0001. One-way ANOVA with Tukey’s multiple comparisons test was used for (**C**) and (**E**).
